# Supplementary material for: Immune cellular patterns of distribution affect outcomes of patients with non-small cell lung cancer
Source: PubMed Central journal article supplement (PMC10130161; doi:10.1038/s41467-023-37905-y), 2023-04-25
Supplement: 41467_2023_37905_MOESM1_ESM.pdf [file 41467_2023_37905_MOESM1_ESM.pdf]

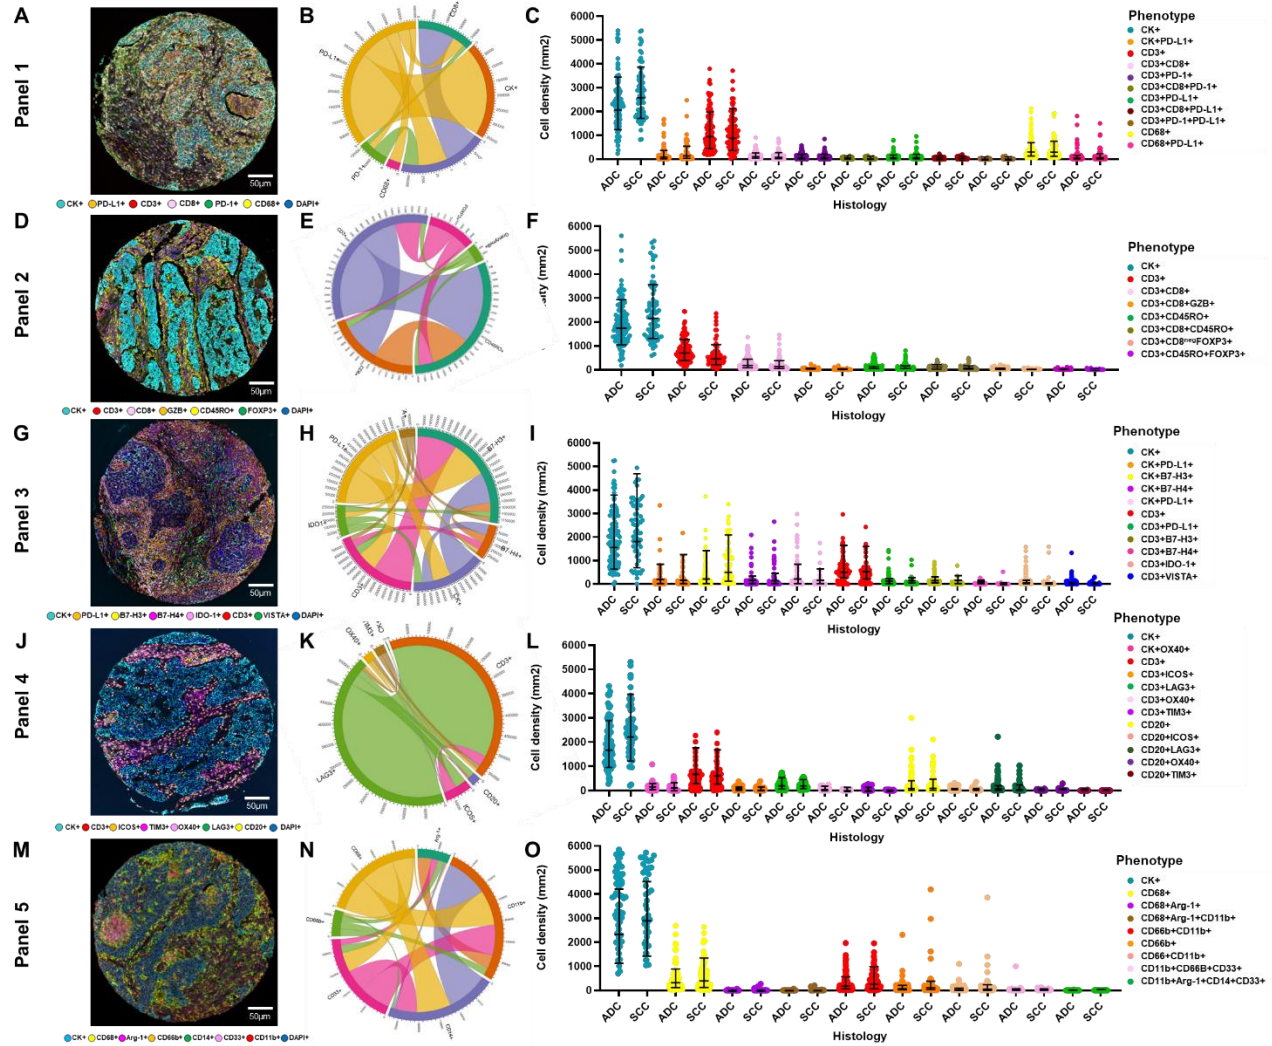

**Supplementary Figure 1. Representative examples of multispectral images and individual cord plots for each multiplex immunofluorescence (mIF) panel and the most commonly observed cell phenotype densities in each panel.** Composite spectral mixing images from mIF (20× magnification, scale bars represent 50µm on each image) showing the diversity of marker co-expression for (A) panel 1, (D) panel 2, (G) panel 3, (J) panel 4, and (M) panel 5. (B, E, H, K, N) Chord diagram visualizations showing the diversity of overall inter-relationships between co-expression of markers in each mIF panel. (C, F, I, L, O) Scatter plots of individual densities and their error bars presented as median values from the most common cell phenotype densities observed in the mIF panels, divided by histologic type (adenocarcinoma [ADC=142 samples] or squamous cell carcinoma [SCC=83 samples]). Panel 1, 11 cells phenotypes; panel 2, 8 cell phenotypes; panel 3, 11 cell phenotypes; panel 4, 12 cell phenotypes; panel 5, 9 cell phenotypes. Experiments and quantifications related to the presented results were conducted once. The images were generated using Vectra-Polaris 1.0.13 scanner system and InForm 2.4.8 image analysis software (Akoya Biosciences), chord diagrams were generated using R studio software version 3.6.1, and scatter plots and error bars were generated using GraphPad Prism v.9.0.0. Data from 225 samples was used in mIF. (Source data is provided as a source data file).

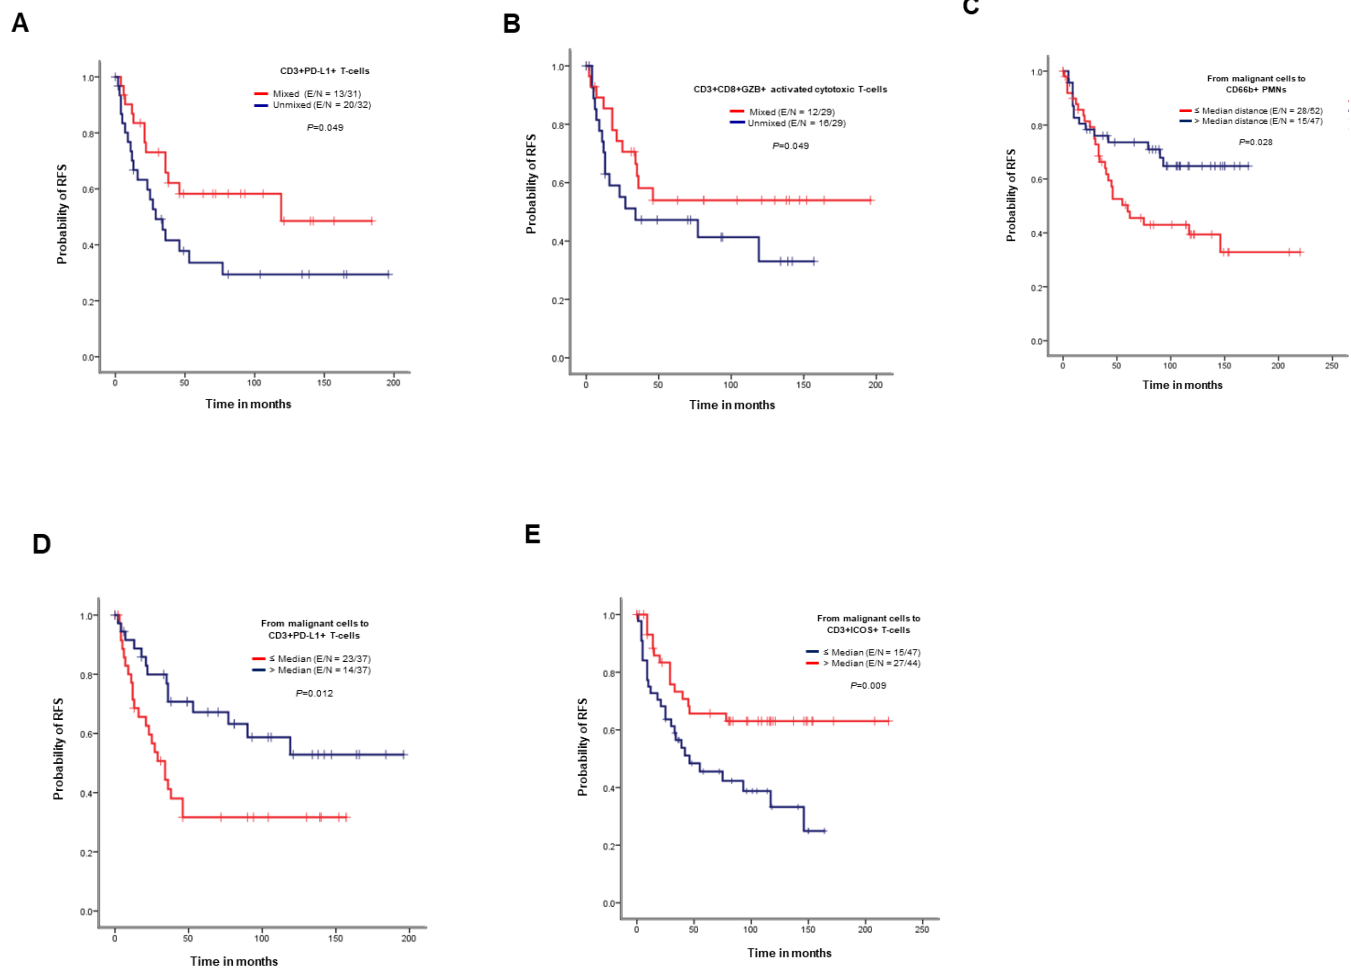

**Supplementary Figure 2. Kaplan-Meier analysis of recurrence-free survival (RFS) by patterns of distribution and distance from malignant cells to various immune cell subpopulations.** Blue lines indicate an unmixed pattern and red lines indicate a mixed pattern between malignant cells and immune cells for (A) CD3+PD-L1+ T-cells and (B) CD3+CD8+granzyme B (GZB)+ activated cytotoxic T-cells in lung squamous cell carcinoma specimens. Blue lines indicate long (>median) distances and red lines indicate close ( $\leq$ median) distances from malignant cells to (C) CD66b+ granulocytes (PMNs) in lung adenocarcinoma specimens and (D) CD3+PD-L1+ T-cells and (E) CD3+ICOS+ T-cells in lung squamous cell carcinoma specimens. Kaplan-Meier curves and log-rank test were used and generated by the R studio software version 3.6.0. using the distribution patterns and distances from the 26-cell phenotypes with un-adjusted *P*-values ( $n=225$  samples), (Source data is provided as a source data file).

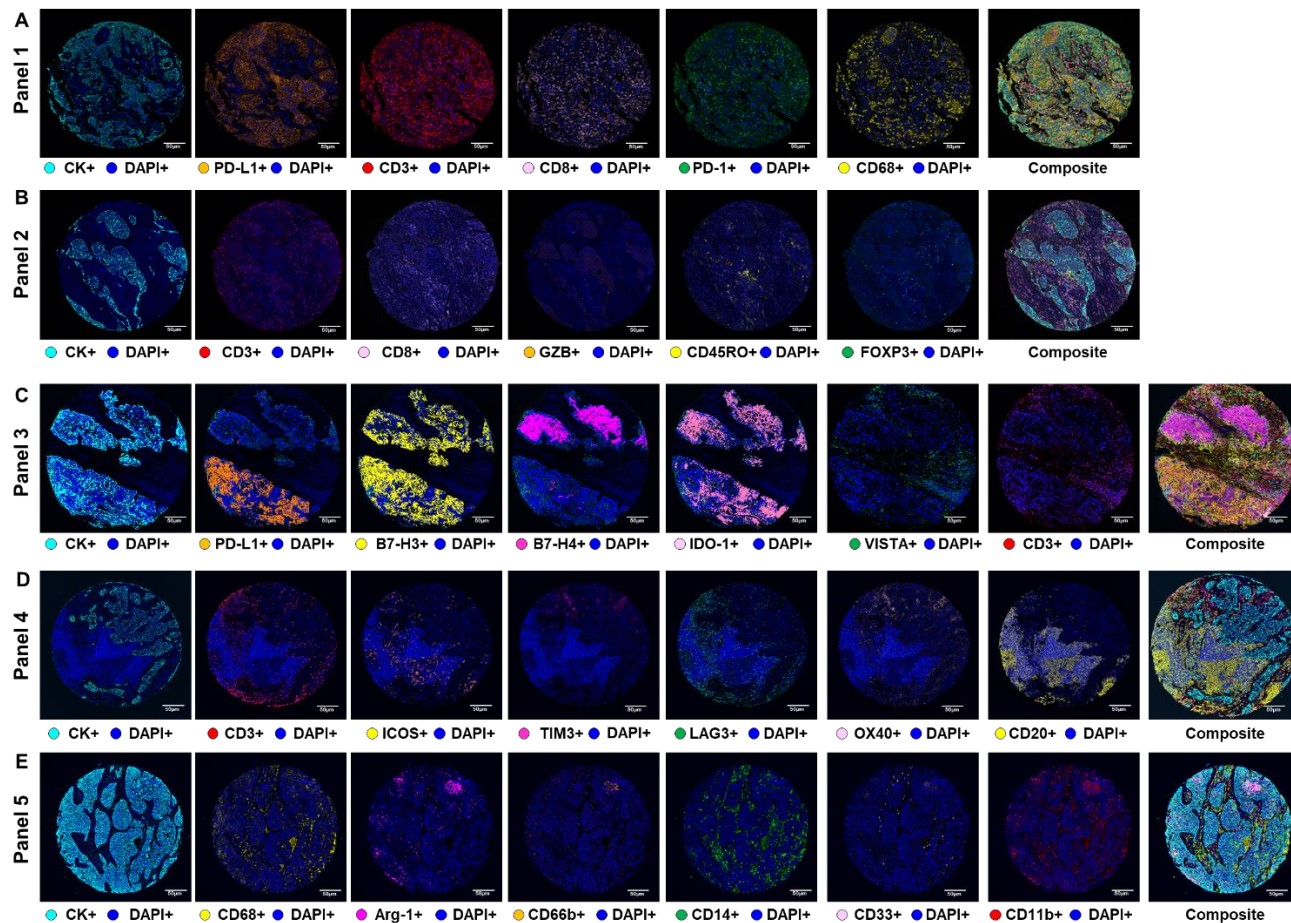

**Supplementary Figure 3. Representative examples of unmixed and mixed multispectral image samples from the five-multiplex immunofluorescence (mIF) panels.** Unmixed images (20× magnification, scale bars represent 50µm on each image) showing the individual marker's expression plus DAPI (4',6-diamidino-2-phenylindole) and their composite mixed image contained all the markers plus DAPI from the mIF panel 1, cytokeratin (CK), CD3, CD8, PD-1, PD-L1, and CD68 (A); panel 2, CK, CD3, CD8, CD45RO, granzyme B (GZB), and FOXP3 (B); panel 3, CK, CD3, PD-L1, B7-H3, B7-H4, IDO-1, and VISTA (C); panel 4, CK, CD3, ICOS, LAG3, OX40, TIM3, and CD20 (D); and panel 5, CK, Arg-1, CD11b, CD14, CD33, CD66b, and CD68 (E). Experiments and quantifications related to the presented results were conducted once. The images were generated using the Vectra-Polaris 1.0.13 scanner system and InForm 2.4.8 image analysis software (Akoya Biosciences). Data from 225 samples was used in mIF. (Source data is provided as a source data file).

**Supplementary Table 1.** Frequently observed phenotypes in the five multiplex immunofluorescence panels in the non-small cell lung cancer cohort (n = 225).

| Panel                  | Marker co-expression                          | Phenotype                                    |
|------------------------|-----------------------------------------------|----------------------------------------------|
| 1                      | CK+                                           | All malignant cells                          |
|                        | CK+PD-L1+                                     | All malignant cells expressing PD-L1         |
|                        | CD3+                                          | All T lymphocytes                            |
|                        | CD3+CD8+                                      | Cytotoxic T-cells                            |
|                        | CD3+PD-1+                                     | Antigen-experienced T-cells                  |
|                        | CD3+CD8+PD-1+                                 | Antigen-experienced cytotoxic T-cells        |
|                        | CD3+CD8+PD-L1+                                | Cytotoxic T-cells expressing PD-L1           |
|                        | CD3+PD-1+PD-L1+                               | Antigen-experienced PD-L1 T-cells            |
|                        | CD3+CD8+PD-1+PD-L1+                           | Antigen-experienced PD-L1 cytotoxic T-cells  |
|                        | CD68+                                         | All tumor-associated macrophages             |
| CD68+PD-L1+            | Tumor-associated macrophages expressing PD-L1 |                                              |
| 2                      | CK+                                           | All malignant cells                          |
|                        | CD3+                                          | All T lymphocytes                            |
|                        | CD3+CD8+                                      | Cytotoxic T-cells                            |
|                        | CD3+CD8+GZB+                                  | Activated cytotoxic T-cells                  |
|                        | CD3+CD45RO+                                   | Memory T-cells                               |
|                        | CD3+CD8+CD45RO+                               | Effector/memory T-cells                      |
|                        | CD3+CD8 <sup>neg</sup> FOXP3+                 | Regulatory T-cells                           |
| CD3+CD45RO+FOXP3+      | Regulatory/memory T-cells                     |                                              |
| 3                      | CK+                                           | All malignant cells                          |
|                        | CK+PD-L1+                                     | Malignant cells expressing PD-L1             |
|                        | CK+B7-H3+                                     | Malignant cells expressing B7-H3             |
|                        | CK+B7-H4+                                     | Malignant cells expressing B7-H4             |
|                        | CK+IDO-1+                                     | Malignant cells expressing IDO-1             |
|                        | CD3+                                          | All T lymphocytes                            |
|                        | CD3+PD-L1+                                    | T-cells expressing PD-L1                     |
|                        | CD3+B7-H3+                                    | T-cells expressing B7-H3                     |
|                        | CD3+B7-H4+                                    | T-cells expressing B7-H4                     |
|                        | CD3+IDO-1+                                    | T-cells expressing IDO-1                     |
| CD3+VISTA+             | T-cells expressing VISTA                      |                                              |
| 4                      | CK+                                           | All malignant cells                          |
|                        | CK+OX40+                                      | Malignant cells expressing OX40              |
|                        | CD3+                                          | All T lymphocytes                            |
|                        | CD3+ICOS+                                     | T-cells expressing ICOS                      |
|                        | CD3+LAG3+                                     | T-cells expressing LAG3                      |
|                        | CD3+OX40+                                     | T-cells expressing OX40                      |
|                        | CD3+TIM3+                                     | T-cells expressing TIM3                      |
|                        | CD20+                                         | All B lymphocytes                            |
|                        | CD20+ICOS+                                    | B-cells expressing ICOS                      |
|                        | CD20+LAG3+                                    | B-cells expressing LAG3                      |
| CD20+OX40+             | B-cells expressing OX40                       |                                              |
| CD20+TIM3+             | B-cells expressing TIM3                       |                                              |
| 5                      | CK+                                           | All malignant cells                          |
|                        | CD68+                                         | All tumor-associated macrophages             |
|                        | CD68+Arg-1+                                   | Type II tumor-associated macrophages         |
|                        | CD68+Arg-1+CD11b+                             | Myeloid type II tumor-associated macrophages |
|                        | CD68+CD11b+                                   | Dendritic macrophages                        |
|                        | CD66b+                                        | All granulocytes                             |
|                        | CD11b+CD66b+                                  | Myeloid granulocytes                         |
| CD11b+Arg-1+CD14+CD33+ | Monocytic myeloid-derived suppressor cells    |                                              |
| CD11b+CD66b+CD33+      | Granulocytic myeloid-derived suppressor cells |                                              |

**Note:** CK, cytokeratin; GZB, granzyme B.

**Supplementary Table 2.** Median densities of cell phenotypes by histologic type.

| Panel             | Phenotype                     | Cells/mm <sup>2</sup> |                     |                              | P <sup>†</sup> |
|-------------------|-------------------------------|-----------------------|---------------------|------------------------------|----------------|
|                   |                               | NSCLC (%)*            | Adenocarcinoma (%)* | Squamous cell carcinoma (%)* |                |
| 1                 | CK+                           | 2342.70               | 2281.72             | 2609.02                      | 0.005          |
|                   | CK+PD-L1+                     | 90.63 (5.51)          | 87.74 (4.50)        | 133.65 (4.87)                | 0.051          |
|                   | CD3+                          | 834.54                | 1012.85             | 1022.33                      | 0.910          |
|                   | CD3+CD8+                      | 128.42                | 199.75              | 143.16                       | 0.043          |
|                   | CD3+PD-1+                     | 39.53                 | 53.32               | 71.69                        | 0.607          |
|                   | CD3+PD-L1+                    | 45.15                 | 47.59               | 68.09                        | 0.046          |
|                   | CD3+CD8+PD-1+                 | 4.75                  | 8.73                | 6.27                         | 0.479          |
|                   | CD3+CD8+PD-L1+                | 6.42                  | 8.26                | 13.12                        | 0.139          |
|                   | CD3+PD-1+PD-L1+               | 2.07                  | 2.94                | 4.23                         | 0.055          |
|                   | CD68+                         | 277.14                | 312.32              | 382.11                       | 0.963          |
| CD68+PD-L1+       | 40.48                         | 39.47                 | 58.26               | 0.259                        |                |
| 2                 | CK+                           | 1911.12               | 1812.05             | 2232.66                      | 0.013          |
|                   | CD3+                          | 961.09                | 1094.53             | 1066.96                      | 0.123          |
|                   | CD3+CD8+                      | 144.60                | 193.12              | 136.25                       | 0.024          |
|                   | CD3+CD8+GZB+                  | 5.31                  | 6.00                | 6.93                         | 0.789          |
|                   | CD3+CD45RO+                   | 57.39                 | 93.95               | 59.29                        | 0.008          |
|                   | CD3+CD8+CD45RO+               | 25.44                 | 51.91               | 28.06                        | 0.037          |
|                   | CD3+CD8 <sup>neg</sup> FOXP3+ | 24.10                 | 30.02               | 25.51                        | 0.328          |
|                   | CD3+CD45RO+FOXP3+             | 3.67                  | 5.26                | 4.73                         | 0.109          |
| 3                 | CK+                           | 2013.57               | 1797.32             | 2307.99                      | 0.050          |
|                   | CK+PD-L1+                     | 88.90 (4.41)          | 91.40 (5.08)        | 140.72 (6.09)                | 0.089          |
|                   | CK+B7-H3+                     | 307.79 (15.29)        | 172.92 (9.59)       | 745.80 (32.31)               | <0.001         |
|                   | CK+B7-H4+                     | 7.08 (0.35)           | 1.05 (0.05)         | 31.78 (1.37)                 | <0.001         |
|                   | CK+IDO-1+                     | 19.17 (0.95)          | 34.06 (1.89)        | 5.09 (0.22)                  | 0.015          |
|                   | CD3+                          | 813.77                | 974.78              | 948.77                       | 0.155          |
|                   | CD3+PD-L1+                    | 38.72                 | 32.21               | 50.76                        | 0.044          |
|                   | CD3+B7-H3+                    | 8.86                  | 12.73               | 6.32                         | 0.388          |
|                   | CD3+B7-H4+                    | 0.00                  | 0.00                | 0.00                         | 0.267          |
|                   | CD3+IDO-1+                    | 1.50                  | 5.15                | 0.47                         | 0.005          |
| CD3+VISTA+        | 1.76                          | 2.01                  | 1.63                | 0.540                        |                |
| 4                 | CK+                           | 2028.33               | 1743.00             | 2428.43                      | 0.001          |
|                   | CK+OX40+                      | 25.38 (1.25)          | 29.97 (1.72)        | 19.33 (0.79)                 | 0.557          |
|                   | CD3+                          | 929.81                | 1040.91             | 913.43                       | 0.143          |
|                   | CD3+ICOS+                     | 36.19                 | 36.92               | 33.42                        | 0.841          |
|                   | CD3+LAG3+                     | 229.81                | 240.34              | 213.43                       | 0.651          |
|                   | CD3+OX40+                     | 12.07                 | 14.68               | 8.27                         | 0.134          |
|                   | CD3+TIM3+                     | 6.64                  | 7.90                | 4.20                         | 0.020          |
|                   | CD20+                         | 80.07                 | 73.82               | 97.42                        | 0.657          |
|                   | CD20+ICOS+                    | 7.44                  | 7.17                | 7.87                         | 0.497          |
|                   | CD20+OX40+                    | 4.72                  | 6.79                | 2.76                         | 0.157          |
|                   | CD20+TIM3+                    | 0.36                  | 0.42                | 0.00                         | 0.072          |
| CD20+LAG3+        | 31.10                         | 28.62                 | 35.20               | 0.922                        |                |
| 5                 | CK+                           | 2528.17               | 2145.2              | 2617.60                      | 0.004          |
|                   | CD68+                         | 359.51                | 300.73              | 495.39                       | 0.064          |
|                   | CD68+Arg-1+                   | 1.23                  | 1.17                | 1.95                         | 0.250          |
|                   | CD68+Arg-1+CD11b+             | 1.20                  | 1.17                | 1.73                         | 0.314          |
|                   | CD68+CD11b+                   | 231.11                | 180.61              | 344.74                       | 0.012          |
|                   | CD66b+                        | 83.79                 | 70.32               | 111.89                       | 0.045          |
|                   | CD11b+CD66b+                  | 33.58                 | 29.43               | 41.58                        | 0.018          |
|                   | CD11b+Arg-1+CD14+CD33+        | 1.04                  | 0.81                | 1.11                         | 0.765          |
| CD11b+CD66b+CD33+ | 11.44                         | 9.57                  | 13.74               | 0.181                        |                |

**Note:** NSCLC, non-small cell lung cancer; CK, cytokeratin; GZB, granzyme B.

\*Percentage of immune checkpoints related to total CK+ malignant cells.

† P values indicate comparison between adenocarcinoma and squamous cell carcinoma using Kruskal-Wallis test and un-adjusted P-values.

**Supplementary Table 3.** Median distances from malignant cells, T-cells, and macrophages to various cell phenotypes.

|              |                           | <b>Median distance, <math>\mu\text{m}</math></b> |                               |                  |                               |
|--------------|---------------------------|--------------------------------------------------|-------------------------------|------------------|-------------------------------|
| <b>Panel</b> | <b>Phenotype</b>          | <b>From</b>                                      |                               | <b>From</b>      |                               |
|              |                           | <b>CK+PD-L1+</b>                                 | <b>CK+PD-L1<sup>neg</sup></b> | <b>CK+PD-L1+</b> | <b>CK+PD-L1<sup>neg</sup></b> |
| 1            | CD3+                      | 34.15                                            | 16.19                         |                  |                               |
|              | CD3+CD8+                  | 76.03                                            | 45.80                         |                  |                               |
|              | CD3+PD-1+                 | 113.35                                           | 68.20                         |                  |                               |
|              | CD3+PD-L1+                | 217.38                                           | 166.86                        |                  |                               |
|              | CD3+CD8+PD-1+             | 115.38                                           | 69.65                         |                  |                               |
|              | CD3+CD8+PD-L1+            | 218.40                                           | 147.99                        |                  |                               |
|              | CD3+PD-1+PD-L1+           | 338.72                                           | 264.19                        |                  |                               |
|              | CD68+                     | 42.31                                            | 12.90                         |                  |                               |
|              | CD68+PD-L1+               | 119.71                                           | 51.89                         |                  |                               |
|              | CD68+PD-L1 <sup>neg</sup> | 45.18                                            | 14.39                         |                  |                               |
|              |                           | <b>From</b>                                      |                               |                  |                               |
|              |                           | <b>CD3+CD8<sup>neg</sup>FOXP3+</b>               |                               |                  |                               |
| 2            | CD3+                      | 8.32                                             |                               |                  |                               |
|              | CD3+CD8+                  | 26.73                                            |                               |                  |                               |
|              | CD3+CD8+GZB+              | 184.98                                           |                               |                  |                               |
|              | CD3+CD45RO+               | 40.83                                            |                               |                  |                               |
|              | CD3+CD8+CD45RO+           | 43.05                                            |                               |                  |                               |
|              | CD3+CD45RO+FOXP3+         | 68.98                                            |                               |                  |                               |
|              |                           | <b>From</b>                                      | <b>From</b>                   | <b>From</b>      | <b>From</b>                   |
|              |                           | <b>CK+PD-L1+</b>                                 | <b>CK+B7-H3+</b>              | <b>CK+B7-H4+</b> | <b>CK+IDO-1+</b>              |
| 3            | CD3+                      | 25.63                                            | 27.54                         | 24.16            | 18.51                         |
|              | CD3+B7-H3+                | 37.96                                            | 65.64                         | 75.92            | 53.51                         |
|              | CD3+B7-H4+                | 58.69                                            | 41.27                         | 82.03            | 43.36                         |
|              | CD3+IDO-1+                | 181.53                                           | 234.05                        | 36.65            | 207.07                        |
|              | CD3+PD-L1+                | 60.66                                            | 62.59                         | 26.67            | 24.07                         |
|              | CD3+VISTA+                | 81.70                                            | 82.81                         | 88.93            | 65.85                         |

**Note:** The table shows fifty distances measurements from malignant cells expressing immune checkpoint markers, malignant cells negative to PD-L1 expression, and regulatory T-cells to twenty-two T-cell phenotypes that were analyzed and associated with clinicopathologic features.

**Supplementary Table 4.** Cox proportional hazards regression model of overall survival in patients with non-small cell lung cancer for the mixed compared with unmixed pattern relative to malignant cells, adjusted for clinicopathologic variables.

| Variable                                  | B      | SE    | Wald  | HR      | 95% CI for Exp(B) | P*           |
|-------------------------------------------|--------|-------|-------|---------|-------------------|--------------|
| Histologic type (ADC vs SCC)              | 0.093  | 0.338 | 0.077 | 1.098   | 0.566-2.129       | 0.782        |
| Smoker (no vs yes)                        | -1.758 | 0.931 | 3.566 | 0.172   | 0.028-1.069       | 0.059        |
| Tumor size ( $\leq 1.5$ cm vs $> 3.8$ cm) | -1.048 | 0.335 | 9.803 | 0.351   | 0.182-0.676       | <b>0.002</b> |
| <i>KRAS</i> (wild-type vs mutant)         | 1.326  | 0.522 | 6.447 | 3.765   | 1.353-10.478      | <b>0.011</b> |
| <i>EGFR</i> (wild-type vs mutant)         | -0.443 | 0.698 | 0.404 | 0.642   | 0.164-2.519       | 0.525        |
| Mixed vs unmixed pattern                  |        |       |       |         |                   |              |
| CD3+                                      | 0.379  | 0.471 | 0.646 | 1.461   | 0.580-3.680       | 0.421        |
| CD3+CD8+                                  | -1.939 | 1.707 | 1.290 | 0.144   | 0.005-4.084       | 0.256        |
| CD3+CD8+GZB+                              | -0.149 | 1.122 | 0.018 | 0.862   | 0.096-7.771       | 0.894        |
| CD3+CD45RO+                               | -0.214 | 1.158 | 0.034 | 0.807   | 0.084-7.805       | 0.853        |
| CD3+CD8+CD45RO+                           | 0.618  | 0.806 | 0.587 | 1.854   | 0.382-9.001       | 0.444        |
| CD3+CD8 <sup>neg</sup> FOXP3+             | 0.448  | 1.310 | 0.117 | 1.565   | 0.120-20.416      | 0.733        |
| CD3+CD45RO+FOXP3+                         | 0.377  | 0.351 | 1.159 | 1.459   | 0.734-2.899       | 0.282        |
| CD3+PD1+                                  | 0.464  | 0.453 | 1.049 | 1.590   | 0.655-3.860       | 0.306        |
| CD3+CD8+PD1+                              | 0.383  | 0.400 | 0.919 | 1.467   | 0.670-3.213       | 0.338        |
| CD3+PD-L1+                                | -0.613 | 0.514 | 1.424 | 0.542   | 0.198-1.483       | 0.233        |
| CD3+CD8+PD-L1                             | -0.092 | 0.439 | 0.044 | 0.912   | 0.386-2.155       | 0.833        |
| CD3+PD1+PD-L1+                            | 0.353  | 0.470 | 0.565 | 1.424   | 0.567-3.579       | 0.452        |
| CD3+B7H3+                                 | -1.978 | 2.308 | 0.734 | 0.138   | 0.002-12.753      | 0.391        |
| CD3+OX40+                                 | -5.213 | 2.705 | 3.712 | 0.005   | 0.000-1.094       | 0.054        |
| CD3+TIM3+                                 | -7.949 | 4.033 | 3.885 | 0.000   | 0.000-0.957       | <b>0.049</b> |
| CD3+LAG3+                                 | -3.491 | 3.423 | 1.040 | 0.030   | 0.000-4.988       | 0.308        |
| CD3+ICOS+                                 | -3.218 | 5.560 | 0.335 | 0.040   | 0.000-3.922       | 0.563        |
| CD20+                                     | 6.727  | 4.259 | 2.495 | 834.726 | 0.198-8.514       | 0.114        |
| CD20+ICOS+                                | 1.770  | 1.595 | 1.231 | 5.871   | 0.258-3.758       | 0.267        |
| CD20+LAG3+                                | -7.539 | 4.015 | 3.526 | 0.001   | 0.000-1.390       | 0.060        |
| CD20+OX40+                                | 5.582  | 5.903 | 0.894 | 265.722 | 0.003-3.930       | 0.344        |
| CD68+                                     | 0.503  | 0.437 | 1.328 | 1.654   | 0.703-3.891       | 0.249        |
| CD68+PD-L1                                | -0.189 | 0.323 | 0.341 | 0.828   | 0.440-1.559       | 0.559        |
| CD68+CD11b+                               | -1.760 | 1.489 | 1.396 | 0.172   | 0.009-3.187       | 0.237        |
| CD66b+                                    | 1.326  | 3.184 | 0.173 | 3.764   | 0.007-9.897       | 0.677        |
| CD66b+CD11b+                              | 4.208  | 5.749 | 0.536 | 67.202  | 0.001-7.698       | 0.464        |
| CD33+CD66b+CD11b+                         | -2.732 | 5.289 | 0.267 | 0.065   | 0.000-68.717      | 0.606        |

**Note:** B, unstandardized regression weight; SE, multiple linear regression; Wald, Wald test; HR, hazard ratio; CI, confidence interval; ADC, adenocarcinoma; SCC, squamous cell carcinoma; GZB, granzyme B.

\*Boldface indicates statistically significant difference using Cox proportional-hazards model with un-adjusted P-values for clinicopathologic variables. The table shows the analysis of spatial distribution patterns of the 27 most relevant cell phenotypes from the different multiplex immunofluorescence panels adjusted by clinicopathologic features.

**Supplementary Table 5.** Cox proportional hazards regression model of overall survival in patients with non-small cell lung cancer for close compared with long distances from malignant cells, adjusted for clinicopathologic variables.

| Variable                                    | B       | SE     | Wald   | HR       | 95% CI for Exp(B) | P*           |
|---------------------------------------------|---------|--------|--------|----------|-------------------|--------------|
| Histologic type (ADC vs SCC)                | -8.882  | 3.643  | 5.943  | 0.000    | 0.000-0.175       | <b>0.015</b> |
| Smoker (no vs yes)                          | 40.279  | 15.617 | 6.652  | 311.000  | 158.436-610.000   | <b>0.010</b> |
| Tumor size ( $\leq 1.5$ cm vs $> 3.8$ cm)   | -15.224 | 6.396  | 5.666  | 0.000    | 0.000-0.068       | <b>0.017</b> |
| <i>KRAS</i> (wild-type vs mutant)           | -15.552 | 6.252  | 6.188  | 0.000    | 0.000-0.037       | <b>0.013</b> |
| <i>EGFR</i> (wild-type vs mutant)           | 50.367  | 14.488 | 12.087 | 748.000  | 348.000-160.000   | <b>0.001</b> |
| Close vs long distance from malignant cells |         |        |        |          |                   |              |
| CD3+                                        | -36.110 | 9.640  | 14.031 | 0.000    | 0.000-0.000       | <b>0.000</b> |
| CD3+CD8+                                    | -13.262 | 7.813  | 2.881  | 0.000    | 0.000-7.779       | 0.090        |
| CD3+CD8+GZB+                                | -13.288 | 5.617  | 5.596  | 0.000    | 0.000-0.102       | <b>0.018</b> |
| CD3+CD45RO+                                 | -4.676  | 5.772  | 0.656  | 0.009    | 0.000-763.242     | 0.418        |
| CD3+CD8+CD45RO+                             | -18.353 | 7.079  | 6.721  | 0.000    | 0.000-0.011       | <b>0.010</b> |
| CD3+CD8 <sup>neg</sup> FOXP3+               | 16.908  | 5.572  | 9.209  | 220.080  | 398.512-121.000   | <b>0.002</b> |
| CD3+CD45RO+FOXP3+                           | 62.550  | 20.627 | 9.196  | 146.000  | 405.000-580.000   | <b>0.002</b> |
| CD3+PD-1+                                   | -33.343 | 10.893 | 9.369  | 0.000    | 0.000-0.000       | <b>0.002</b> |
| CD3+CD8+PD-1+                               | 1.174   | 3.545  | 0.110  | 3.233    | 0.003-336.778     | 0.741        |
| CD3+PD-L1+                                  | -27.268 | 8.001  | 11.616 | 0.000    | 0.000-0.000       | <b>0.001</b> |
| CD3+CD8+PD-L1+                              | 25.574  | 8.672  | 8.698  | 127.000  | 531.863-3074.000  | <b>0.003</b> |
| CD3+PD-1+PD-L1+                             | 7.959   | 4.906  | 2.632  | 2860.982 | 0.191-428.450     | 0.105        |
| CD3+B7H3+                                   | -1.115  | 1.959  | 0.324  | 0.328    | 0.007-15.250      | 0.569        |
| CD3+OX40+                                   | 8.824   | 3.122  | 7.988  | 95.453   | 14.951-30.350     | <b>0.005</b> |
| CD3+TIM3+                                   | -9.908  | 3.224  | 9.446  | 0.000    | 0.000-0.028       | <b>0.002</b> |
| CD3+LAG3+                                   | 26.392  | 8.144  | 10.502 | 289.000  | 338.821-247.000   | <b>0.001</b> |
| CD3+ICOS+                                   | -4.402  | 2.149  | 4.194  | 0.012    | 0.000-0.828       | <b>0.041</b> |
| CD20+                                       | -13.896 | 6.835  | 4.134  | 0.000    | 0.000-0.606       | <b>0.042</b> |
| CD20+ICOS+                                  | -2.166  | 1.625  | 1.777  | 0.115    | 0.005-2.768       | 0.182        |
| CD20+LAG3+                                  | 12.022  | 7.416  | 2.628  | 166.529  | 0.081-341.000     | 0.105        |
| CD20+OX40+                                  | 0.583   | 1.713  | 0.116  | 1.791    | 0.062-51.386      | 0.734        |
| CD68+                                       | -2.416  | 3.874  | 0.389  | 0.089    | 0.000-177.076     | 0.533        |
| CD68+PD-L1+                                 | 25.233  | 8.097  | 9.710  | 908.000  | 116.066-709.000   | <b>0.002</b> |
| CD68+CD11b+                                 | -7.649  | 3.971  | 3.710  | 0.000    | 0.000-1.144       | 0.054        |
| CD66b+CD11b+                                | -14.960 | 5.787  | 6.683  | 0.000    | 0.000-0.027       | <b>0.010</b> |
| CD66b+                                      | 2.988   | 2.657  | 1.265  | 19.852   | 0.109-362.598     | 0.261        |
| CD11b+CD66b+CD33+                           | 2.139   | 2.194  | 0.950  | 8.487    | 0.115-625.386     | 0.330        |

**Note:** B, unstandardized regression weight; SE, multiple linear regression; Wald, Wald test; HR, hazard ratio; CI, confidence interval; ADC, adenocarcinoma; SCC, squamous cell carcinoma, GZB, granzyme B.

\*Boldface indicates statistically significant difference using Cox proportional-hazards model with unadjusted *P*-values for clinicopathologic variables.

The table shows the analysis of distances from malignant cells to the 27 most relevant cell phenotypes of the multiplex immunofluorescence panels adjusted by clinicopathologic features.



**Supplementary Table 6.** Cox proportional hazards regression model of overall survival in patients with non-small cell lung cancer for the four groups of cellular immunologic patterns, adjusted for clinicopathologic variables.

| Variable                                           | B       | SE     | Wald  | HR      | 95% CI for Exp(B) | P*           |
|----------------------------------------------------|---------|--------|-------|---------|-------------------|--------------|
| Histologic type (ADC vs SCC)                       | 0.800   | 1.237  | 0.419 | 2.226   | 0.197-25.152      | 0.518        |
| Smoker (no vs yes)                                 | -7.812  | 3.939  | 3.934 | 0.000   | 0.000-0.912       | <b>0.047</b> |
| Tumor size (≤1.5 cm vs >3.8 cm)                    | -1.165  | 0.797  | 2.134 | 0.312   | 0.065-1.489       | 0.144        |
| <i>KRAS</i> (wild-type vs mutant)                  | 0.532   | 0.953  | 0.311 | 1.701   | 0.263-11.006      | 0.577        |
| <i>EGFR</i> (wild-type vs mutant)                  | -6.622  | 2.922  | 5.135 | 0.001   | 0.000-0.409       | <b>0.023</b> |
| CD3+ (group 1 vs group 4)                          | 2.565   | 3.090  | 0.689 | 13.001  | 0.030-5543.724    | 0.406        |
| CD3+ (group 2 vs group 4)                          | -2.010  | 1.699  | 1.399 | 0.134   | 0.005-3.745       | 0.237        |
| CD3+ (group 3 vs group 4)                          | -11.314 | 5.418  | 4.361 | 0.000   | 0.000-0.499       | <b>0.037</b> |
| CD3+CD8+ (group 1 vs group 4)                      | -7.522  | 4.271  | 3.102 | 0.001   | 0.000-2.337       | 0.078        |
| CD3+CD8+ (group 2 vs group 4)                      | -1.446  | 1.367  | 1.118 | 0.236   | 0.016-3.436       | 0.290        |
| CD3+CD8+GZB+ (group 1 vs group 4)                  | -1.049  | 2.601  | 0.163 | 0.350   | 0.002-57.275      | 0.687        |
| CD3+CD8+GZB+ (group 2 vs group 4)                  | -0.456  | 2.516  | 0.033 | 0.634   | 0.005-87.813      | 0.856        |
| CD3+CD45RO+ (group 1 vs group 4)                   | -12.135 | 8.891  | 1.863 | 0.000   | 0.000-198.621     | 0.172        |
| CD3+CD45RO+ (group 2 vs group 4)                   | -0.234  | 1.373  | 0.029 | 0.792   | 0.054-11.678      | 0.865        |
| CD3+CD45RO+ (group 3 vs group 4)                   | -2.076  | 2.998  | 0.480 | 0.125   | 0.000-44.665      | 0.489        |
| CD3+CD8+CD45RO+ (group vs group 4)                 | 1.917   | 2.048  | 0.877 | 6.801   | 0.123-376.288     | 0.349        |
| CD3+CD8+CD45RO+ (group 2 vs group 4)               | -2.601  | 1.156  | 5.059 | 0.074   | 0.008-0.716       | <b>0.024</b> |
| CD3+CD8 <sup>neg</sup> FOXP3+ (group 2 vs group 4) | 8.510   | 3.160  | 7.254 | 496.458 | 10.148-242.835    | <b>0.007</b> |
| CD3+CD8 <sup>neg</sup> FOXP3+ (group 3 vs group 4) | 6.987   | 3.434  | 4.140 | 108.501 | 1.292-906.134     | <b>0.042</b> |
| CD3+CD45RO+FOXP3+ (group 1 vs group 4)             | -0.161  | 1.639  | 0.010 | 0.851   | 0.034-21.121      | 0.922        |
| CD3+CD45RO+FOXP3+ (group 2 vs group 4)             | 1.791   | 1.090  | 2.700 | 5.998   | 0.708-50.827      | 0.100        |
| CD3+CD45RO+FOXP3+ (group 3 vs group 4)             | 2.011   | 1.157  | 3.023 | 7.470   | 0.774-72.069      | 0.082        |
| CD3+PD-1+ (group 1 vs group 4)                     | 3.854   | 3.138  | 1.508 | 47.173  | 0.101-221.041     | 0.219        |
| CD3+PD-1+ (group 2 vs group 4)                     | 1.764   | 1.816  | 0.943 | 5.835   | 0.166-205.211     | 0.332        |
| CD3+PD-1+ (group 3 vs group 4)                     | -0.811  | 2.500  | 0.105 | 0.445   | 0.003-59.739      | 0.746        |
| CD3+CD8+PD-1+ (group 1 vs group 4)                 | -1.759  | 1.687  | 1.087 | 0.172   | 0.006-4.699       | 0.297        |
| CD3+CD8+PD-1+ (group 2 vs group 4)                 | -1.008  | 1.565  | 0.415 | 0.365   | 0.017-7.831       | 0.519        |
| CD3+CD8+PD-1+ (group 3 vs group 4)                 | 0.804   | 1.646  | 0.239 | 2.236   | 0.089-56.265      | 0.625        |
| CD3+PD-L1+ (group 1 vs group 4)                    | -2.611  | 2.203  | 1.405 | 0.073   | 0.001-5.510       | 0.236        |
| CD3+PD-L1+ (group 2 vs group 4)                    | -1.766  | 1.238  | 2.034 | 0.171   | 0.015-1.937       | 0.154        |
| CD3+PD-L1+ (group 3 vs group 4)                    | 3.337   | 3.555  | 0.881 | 28.147  | 0.026-299.325     | 0.348        |
| CD3+CD8+PD-L1+ (group 1 vs group 4)                | 0.945   | 1.906  | 0.246 | 2.573   | 0.061-107.755     | 0.620        |
| CD3+CD8+PD-L1+ (group 2 vs group 4)                | 2.448   | 1.778  | 1.897 | 11.570  | 0.355-377.126     | 0.168        |
| CD3+CD8+PD-L1+ (group 3 vs group 4)                | 0.928   | 1.653  | 0.315 | 2.529   | 0.099-64.603      | 0.575        |
| CD3+PD-1+PD-L1+ (group 1 vs group 4)               | 3.461   | 1.949  | 3.153 | 31.837  | 0.698-145.264     | 0.076        |
| CD3+PD-1+PD-L1+ (group 2 vs group 4)               | 0.785   | 1.556  | 0.254 | 2.192   | 0.104-46.251      | 0.614        |
| CD3+PD-1+PD-L1+ (group 3 vs group 4)               | 3.071   | 1.504  | 4.169 | 21.557  | 1.131-410.864     | <b>0.041</b> |
| CD3+B7-H3+ (group 1 vs group 4)                    | 0.000   | 11.204 | 0.000 | 1.000   | 0.000-891.000     | 1.000        |
| CD3+B7-H3+ (group 2 vs group 4)                    | -22.419 | 75.405 | 0.088 | 0.000   | 0.000-2.810       | 0.766        |
| CD3+OX40+ (group 1 vs group 4)                     | -20.472 | 19.313 | 1.124 | 0.000   | 0.000-353.570     | 0.289        |
| CD3+OX40+ (group 2 vs group 4)                     | -4.087  | 7.654  | 0.285 | 0.017   | 0.000-549.984     | 0.593        |
| CD3+OX40+ (group 3 vs group 4)                     | -16.344 | 13.628 | 1.438 | 0.000   | 0.000-317.771     | 0.230        |
| CD68+ (group 1 vs group 4)                         | -1.130  | 1.582  | 0.510 | 0.323   | 0.015-7.181       | 0.475        |
| CD68+ (group 2 vs group 4)                         | -0.597  | .838   | 0.507 | 0.551   | 0.106-2.848       | 0.477        |
| CD68+ (group 3 vs group 4)                         | -2.618  | 2.122  | 1.522 | 0.073   | 0.001-4.669       | 0.217        |
| CD68+PD-L1+ (group 1 vs group 4)                   | -0.122  | 1.213  | 0.010 | 0.885   | 0.082-9.531       | 0.920        |
| CD68+PD-L1+ (group 2 vs group 4)                   | 0.421   | 1.125  | 0.140 | 1.523   | 0.168-13.806      | 0.708        |
| CD68+PD-L1+ (group 3 vs group 4)                   | -0.467  | 1.491  | 0.098 | 0.627   | 0.034-11.657      | 0.754        |

**Note:** HR, hazard ratio; CI, confidence interval; ADC, adenocarcinoma; SCC, squamous cell carcinoma; GZB, granzyme B; group 1, mixed pattern with close median distances to malignant cells; group 2, mixed pattern with long median distances to malignant cells; group 3, unmixed pattern with close median distances to malignant cells; group 4, unmixed pattern with long median distances to malignant cells.

\***Boldface** indicates statistically significant difference using Cox proportional-hazards model with un-adjusted *P*-values for clinicopathologic variables. The table shows the analysis of cellular immunologic patterns of 16 relevant cell phenotypes of the multiplex immunofluorescence panels adjusted by clinicopathologic features.

**Supplementary Table 7.** Characteristics of the 225 patients with NSCLC whose tumor specimens were included in our study.

| Characteristic    | All patients,<br>n=225 | Type of NSCLC, no. (%)   |                                  |
|-------------------|------------------------|--------------------------|----------------------------------|
|                   |                        | Adenocarcinoma,<br>n=142 | Squamous cell<br>carcinoma, n=83 |
| Median age        | 66 years               | 64.5 years               | 67 years                         |
| Sex               |                        |                          |                                  |
| Female            | 107 (48)               | 71 (50)                  | 36 (43)                          |
| Male              | 118 (52)               | 71 (50)                  | 47 (57)                          |
| Tobacco history   |                        |                          |                                  |
| No                | 18 (8)                 | 17 (12)                  | 1 (1)                            |
| Yes               | 207 (92)               | 125 (88)                 | 82 (99)                          |
| Smoking status    |                        |                          |                                  |
| Never             | 18 (8)                 | 17 (12)                  | 1 (1)                            |
| Former            | 102 (45)               | 64 (45)                  | 38 (46)                          |
| Current           | 105 (47)               | 61 (43)                  | 44 (53)                          |
| Median tumor size | 3.5 cm                 | 3.15 cm                  | 3.8 cm                           |
| Tumor status*     |                        |                          |                                  |
| T <sub>1</sub>    | 70 (31)                | 43 (30)                  | 27 (33)                          |
| T <sub>2</sub>    | 90 (40)                | 65 (46)                  | 25 (30)                          |
| T <sub>3</sub>    | 40 (18)                | 21 (15)                  | 19 (23)                          |
| T <sub>4</sub>    | 25 (11)                | 13 (9)                   | 12 (14)                          |
| Nodal status*     |                        |                          |                                  |
| N <sub>0</sub>    | 148 (66)               | 98 (69)                  | 50 (60)                          |
| N <sub>1</sub>    | 46 (20)                | 25 (18)                  | 21 (25)                          |
| N <sub>2</sub>    | 31 (14)                | 19 (13)                  | 12 (15)                          |
| Stage*            |                        |                          |                                  |
| I                 | 102 (45)               | 71 (50)                  | 31 (37)                          |
| II                | 60 (27)                | 35 (25)                  | 25 (30)                          |
| III               | 63 (28)                | 36 (25)                  | 27 (33)                          |
| Adjuvant therapy† |                        |                          |                                  |
| No                | 134 (60)               | 86 (61)                  | 48 (58)                          |
| Yes               | 86 (38)                | 53 (37)                  | 33 (40)                          |
| Mutation status   |                        |                          |                                  |
| KRAS              |                        |                          |                                  |
| No                | 113 (50)               | 100 (70)                 | 13 (16)                          |
| Yes               | 37 (16)                | 37 (26)                  | 0 (0)                            |
| Unknown           | 75 (33)                | 5 (4)                    | 70 (84)                          |
| EGFR              |                        |                          |                                  |
| No                | 147 (65)               | 101 (71)                 | 46 (55)                          |
| Yes               | 20 (9)                 | 20 (14)                  | 0 (0)                            |
| Unknown           | 58 (26)                | 21 (15)                  | 37 (45)                          |
| Follow-up         |                        |                          |                                  |
| Mean RFS          | 3.84 years             | 4.21 years               | 3.08 years                       |
| Mean OS           | 6.13 years             | 6.93 years               | 4.19 years                       |

**Note:** NSCLC, non-small cell lung cancer; RFS, recurrence-free survival; OS, overall survival.

\*American Joint Committee on Cancer classification.

†Adjuvant therapy status was unknown in 3 patients with adenocarcinoma and 2 patients with squamous cell carcinoma.

**Supplementary Table 8.** Characteristics of multiplex immunofluorescence panels using Opal 7 and coumarin fluorophores (Akoya Biosciences).

| Panel | Antibody | Clone        | Vendor                   | Catalog#   | AR  | Antibody dilution | F        | F dilution |
|-------|----------|--------------|--------------------------|------------|-----|-------------------|----------|------------|
| 1     | CK       | AE1/AE3      | DAKO                     | M351501-2  | PH6 | 1:50              | 620      | 1:100      |
|       | CD3      | Polyclonal   | DAKO                     | A045201-2  | PH6 | 1:100             | 690      | 1:100      |
|       | CD8      | C8/144B      | Thermo Scientific        | MS-457s    | PH6 | 1:25              | 540      | 1:100      |
|       | PD-1     | [EPR4877(2)] | ABCAM                    | AB137132   | PH9 | 1:3000            | 650      | 1:200      |
|       | PD-L1    | E1L3N        | Cell Signaling           | 13684S     | PH6 | 1:1000            | 570      | 1:100      |
|       | CD68     | PG-M1        | DAKO                     | M087601-2  | PH6 | 1:25              | 520      | 1:100      |
| 2     | CK       | AE1/AE3      | DAKO                     | M351501-2  | PH6 | 1:50              | 620      | 1:100      |
|       | CD3      | Polyclonal   | DAKO                     | A045201-2  | PH9 | 1:100             | 690      | 1:100      |
|       | CD8      | C8/144B      | Thermo Scientific        | MS-457s    | PH6 | 1:25              | 540      | 1:100      |
|       | CD45RO   | UCHL1        | Leica Biosystems         | PA0146     | PH6 | RTU               | 520      | 1:100      |
|       | GZB      | 11F1         | Leica Biosystems         | PA0291     | PH9 | RTU               | 570      | 1:100      |
|       | FOXP3    | D2W8E        | Cell Signaling           | 98377S     | PH6 | 1:50              | 650      | 1:200      |
| 3     | CK       | AE1/AE3      | DAKO                     | M351501-2  | PH6 | 1:25              | Coumarin | 1:100      |
|       | CD3      | Polyclonal   | DAKO                     | A045201-2  | PH6 | 1:200             | 650      | 1:300      |
|       | PD-L1    | E1L3N        | Cell Signaling           | 13684S     | PH6 | 1:3000            | 570      | 1:100      |
|       | B7-H3    | D9M2L        | Cell Signaling           | 14058S     | PH9 | 1:200             | 540      | 1:100      |
|       | B7-H4    | D1M8I        | Cell Signaling           | 14572S     | PH9 | 1:500             | 480      | 1:100      |
|       | IDO-1    | SP260        | ABCAM                    | AB228468   | PH6 | 1:800             | 620      | 1:100      |
|       | VISTA    | D1L2G        | Cell Signaling           | 64953S     | PH9 | 1:50              | 520      | 1:100      |
| 4     | CK       | AE1/AE3      | DAKO                     | M351501-2  | PH9 | 1:25              | Coumarin | 1:100      |
|       | CD3      | polyclonal   | DAKO                     | A045201-2  | PH6 | 1:200             | 690      | 1:100      |
|       | ICOS     | D1K2T        | Cell Signaling           | 89601S     | PH6 | 1:200             | 520      | 1:100      |
|       | LAG3     | D2G4O        | Cell Signaling           | 15372S     | PH6 | 1:200             | 650      | 1:200      |
|       | OX40     | ACT-3        | Affimetrix (eBioscience) | 14-1347-82 | PH6 | 1:10              | 570      | 1:100      |
|       | TIM3     | D5D5R        | Cell Signaling           | 45208S     | PH6 | 1:100             | 540      | 1:100      |
|       | CD20     | L26          | DAKO                     | M075501-2  | PH9 | 1:400             | 620      | 1:100      |
| 5     | CK       | AE1/AE3      | DAKO                     | M351501-2  | PH6 | 1:50              | Coumarin | 1:150      |
|       | Arg-1    | D4E3M        | Cell Signaling           | 93668S     | PH6 | 1:250             | 620      | 1:100      |
|       | CD11b    | EPR1344      | ABCAM                    | AB133357   | PH6 | 1:6000            | 650      | 1:100      |
|       | CD14     | SP192        | ABCAM                    | AB183322   | PH6 | 1:300             | 480      | 1:100      |
|       | CD33     | [PWS44 (M)]  | Leica Biosystems         | PA0555     | PH9 | 1:50              | 520      | 1:100      |
|       | CD66b    | G10F5        | BioLegend                | 305102     | PH6 | 1:100             | 540      | 1:150      |
|       | CD68     | PG-M1        | DAKO                     | M087601-2  | PH6 | 1:50              | 570      | 1:100      |

**Note:** AR, antigen retrieval; CK, cytokeratin; GZB, granzyme B; F, fluorophore.
